# Supplementary material for: Enhancing the Efficacy of Chloramphenicol Therapy for Escherichia coli by Targeting the Secondary Resistome
Source: MDPI journal article supplement (doi:10.3390/antibiotics13010073), 2024-01-12
Supplement: s1 [file s1]

**Table S1.** DNA quality and quantity of CHL-treated libraries.

| Condition             | T0 CFU/ml             | T24 CFU/ml            | 260/280<br>(Nanodrop) | 260/230<br>(Nanodrop) | Qbit HS <sup>1</sup> ng/μl |
|-----------------------|-----------------------|-----------------------|-----------------------|-----------------------|----------------------------|
| MG1655/pFT2_2μg_CHL_1 | 3 × 10 <sup>6</sup>   | 1 × 10 <sup>9</sup>   | 1.87                  | 2.15                  | 124                        |
| MG1655/pFT2_2μg_CHL_2 | 1.6 × 10 <sup>6</sup> | 7.5 × 10 <sup>8</sup> | 1.84                  | 2                     | 184                        |

<sup>1</sup>dsDNA HS (High Sensitivity) Assay Kit.**Table S3.** Primers used for mutants creation, verification, construction of plasmid pACYC184 backbone.

| Primers <sup>1</sup> | Sequence (5'-3')                                              |
|----------------------|---------------------------------------------------------------|
| <i>acrZ</i> -F       | AGCGGTTAGAATAGTCTCATGACTATATCTGGAGTTGACCTGTAGGCTGGAGCTGCTTC   |
| <i>acrZ</i> -R       | GAGAAAAAGAAAATGCCCGACTAAGCGGGCATTACAGGAACATATGAATATCCTCCTTAG  |
| <i>cls</i> -F        | TAAACTCATAACAATGCGCTTTCAAAAGGATTTCTAATCTTGTAGGCTGGAGCTGCTTC   |
| <i>cls</i> -R        | ATCCATAGTTACTACCTGTTTAACTCTGTTGGCGACGTTTCATATGAATATCCTCCTTAG  |
| <i>mdfA</i> -F       | TTATTAAACTCTGCGCGATTATTATTGGCGAAGAAATTGCTGTAGGCTGGAGCTGCTTC   |
| <i>mdfA</i> -R       | TTGAGAAATGCCTGATCGCACAAAGCAGTCAGGCATTTTTTCATATGAATATCCTCCTTAG |
| <i>arcA</i> -F       | ACTTCCTGTTTCGATTTAGTTGGCAATTTAGGTAGCAAAGCTGTAGGCTGGAGCTGCTTC  |
| <i>arcA</i> -R       | CGCTAAAAAGCGCCGTTTTTTTTTGACGGTGGTAAAGCCGACATATGAATATCCTCCTTAG |
| <i>hfq</i> -F        | AAGGTTCAAAGTACAAATAAGCATATAAGGAAAAGAGAGATGTAGGCTGGAGCTGCTTC   |
| <i>hfq</i> -R        | AGGATCGCTGGCTCCCCGTGTAAAAAAACAGCCCGAAACCCATATGAATATCCTCCTTAG  |
| <i>nlpI</i> -F       | AACAGGACGTTTCATTCAACCGTGGTCTTCGGGAGTGGGAATGTAGGCTGGAGCTGCTTC  |
| <i>nlpI</i> -R       | ATGGCAATCAAAAAAGATTACGGGCTGATGTGTACGTCAGCATATGAATATCCTCCTTAG  |
| Primers <sup>2</sup> | Sequence (5'-3')                                              |
| <i>acrZ</i> -F       | CTCCCTGGCTAATGGAACCG                                          |
| <i>acrZ</i> -R       | TCTGCCAGTGCATTGCCAGC                                          |
| <i>cls</i> -F        | ATATTTGCGCGCGATTGCCC                                          |
| <i>cls</i> -R        | AAGTCCGGGTTCAAATCGAA                                          |
| <i>mdfA</i> -F       | GTCGTTGAGAATAAAGTGCA                                          |
| <i>mdfA</i> -R       | TGCCGAGTGGATACAAAGTG                                          |
| <i>arcA</i> -F       | CCTGTTATGTTGCTGTAAAA                                          |
| <i>arcA</i> -R       | GATGTGGGGACTGCTCAACT                                          |
| <i>hfq</i> -F        | AAATGGTTTATCGAGGTGTT                                          |
| <i>hfq</i> -R        | CTTTGGGTGCGGCGCTTTAC                                          |
| <i>nlpI</i> -F       | GGTCAGGAAGTACCGGTGAA                                          |
| <i>nlpI</i> -R       | GGGCTCAAGGATAGGAGCC                                           |
| Primers <sup>3</sup> | Sequence (5'-3')                                              |
| <i>pACYC184_F</i>    | ATTCTCATGTGAGTCAACGCCATGAGC                                   |
| <i>pACYC184_R</i>    | GCGTTGACTCACATGAGAATTACAACCTATATCGTATG                        |

<sup>1</sup>Primers used for mutant creation.<sup>2</sup>Primers used for proof of insertion.<sup>3</sup>Primers used for pACYC184 backbone construction.
