# Supplementary material for: Enhancing the Efficacy of Chloramphenicol Therapy for Escherichia coli by Targeting the Secondary Resistome
Source: MDPI journal article supplement (doi:10.3390/antibiotics13010073), 2024-01-12
Supplement: s1 [file s1]

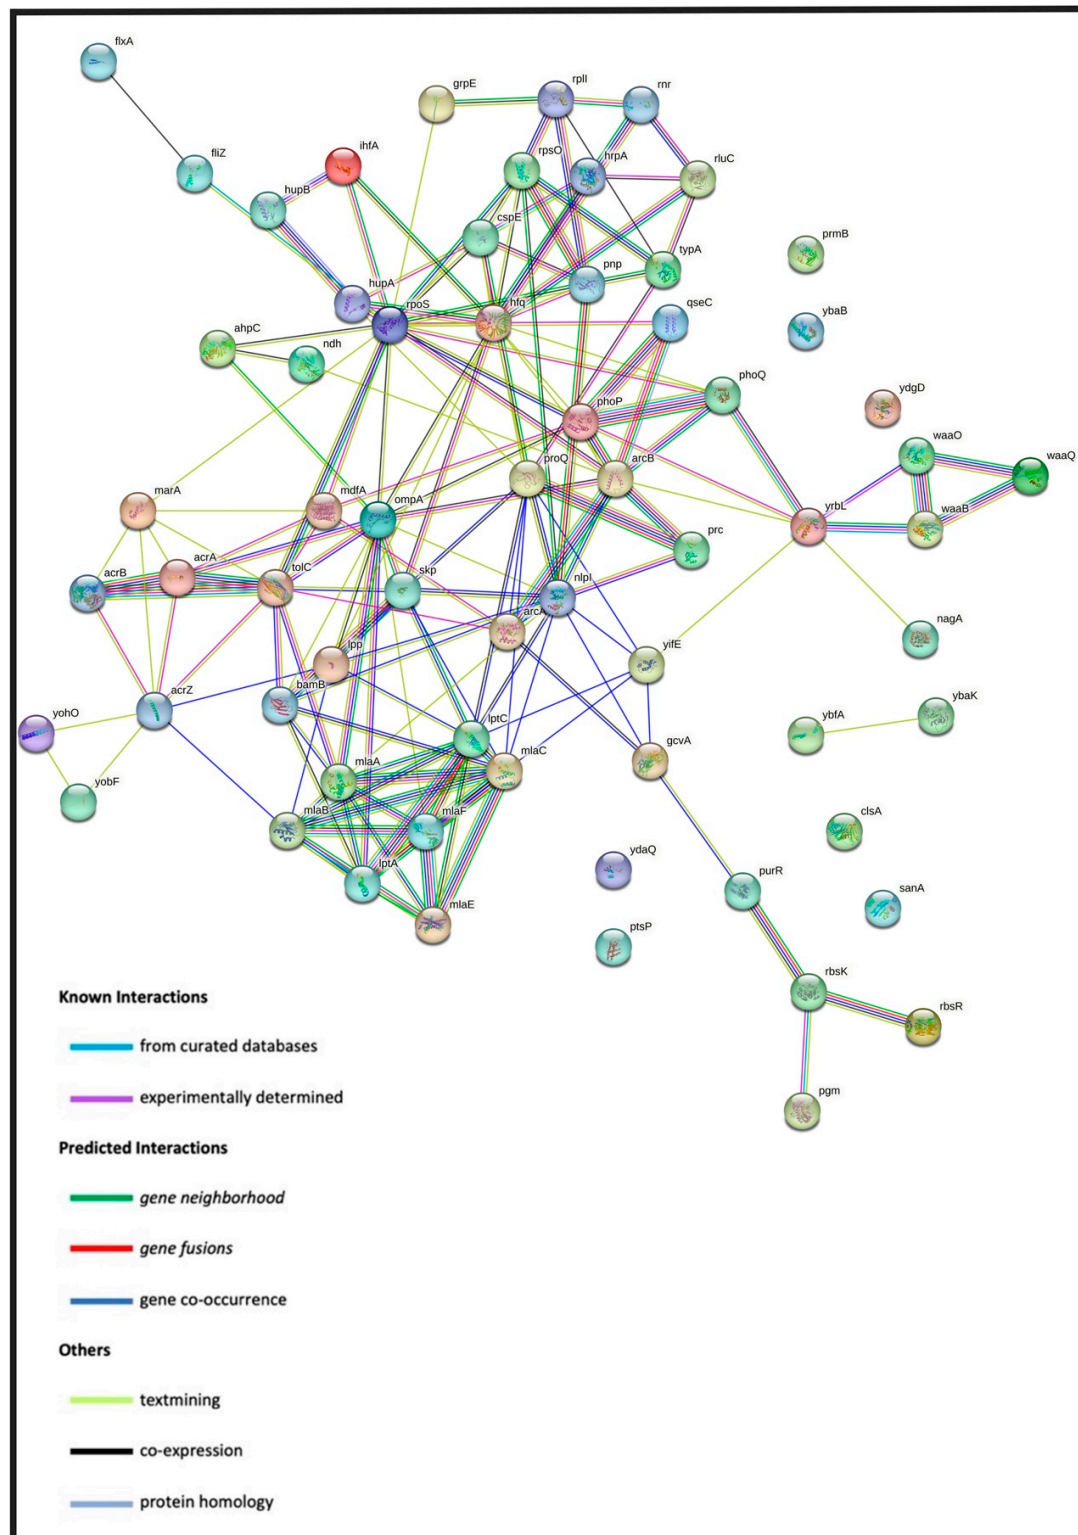

**Figure S1.** STRING analysis visual representation of the interactions between the genes identified as SR to CHL treatment.
